# Supplementary material for: Reduced Carbohydrate Diet Influence on Postprandial Glycemia—Results of a Short, CGM-Based, Interventional Study in Adolescents with Type 1 Diabetes
Source: MDPI journal article supplement (doi:10.3390/nu14214689), 2022-11-05
Supplement: s1 [file s1]

## Supplementary Materials:

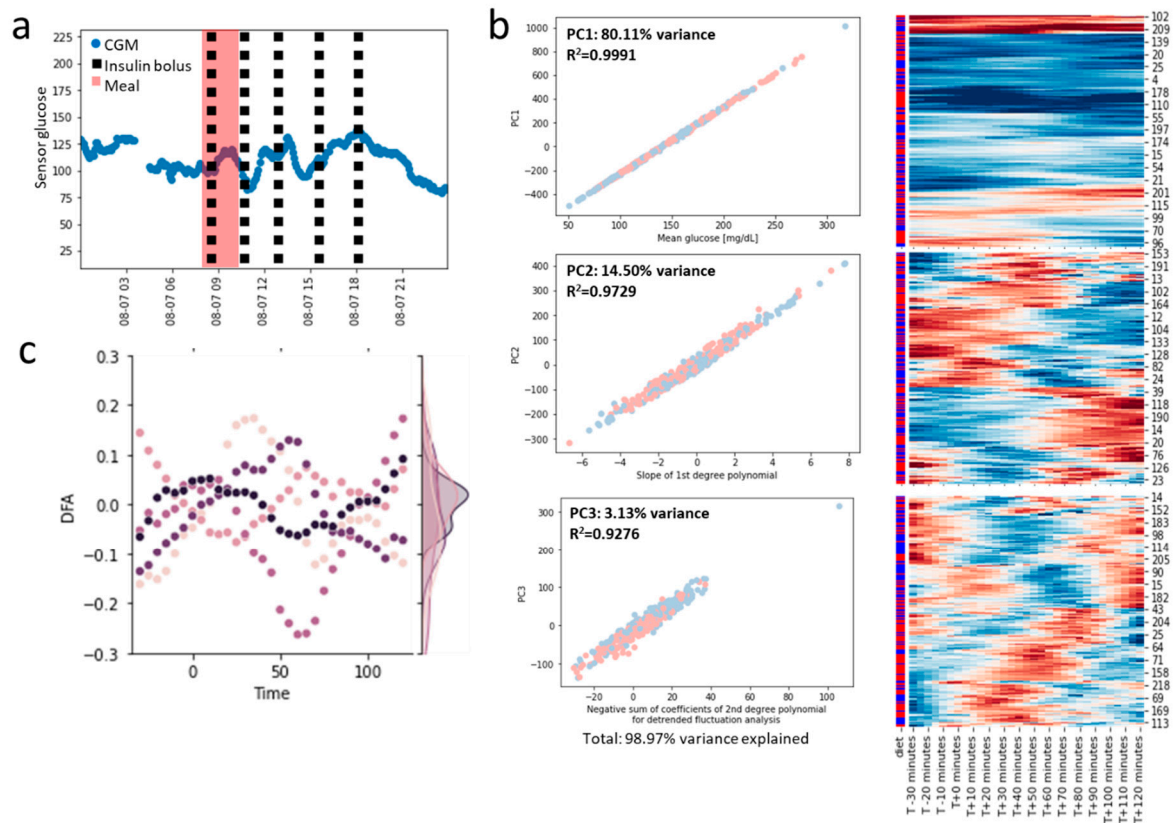

Figure S1. Analysis flowchart and reasoning. (a) Recovery of continuous glucose monitoring and insulin pump data for a meal in the trial cohort process was automated using approximated mealtime and paired CGM sensor-insulin pump data. Two independent researchers manually evaluated each record. 220 CGM-monitored meal responses were collected and successfully paired to meals. Next, principal component analysis was performed to determine sources of variability between collected records. (b) Weights from 1<sup>st</sup>, 2<sup>nd</sup> and 3<sup>rd</sup> principal components were mathematically evaluated and paired with most time-series functions: PC1 – mean of signal, PC2 – slope of 1<sup>st</sup>-degree polynomial, PC3 – coefficients of 2<sup>nd</sup>-degree polynomial. Heatmaps of raw sensor data (PC1), z-score for the record (PC2) and z-score after detrended fluctuation analysis (PC3) are provided for graphical representation of data. (c) 5 example records after detrended fluctuation analysis are plotted against time to demonstrate 2<sup>nd</sup>-degree polynomial-like behavior (PC3).

Table S1. Study group characteristics.

|                                                                | <b>All participants (n=26)</b>   |
|----------------------------------------------------------------|----------------------------------|
|                                                                | <b>Median (25%-75%) or n (%)</b> |
| <b>Tanner score</b>                                            | 5 (4-5)                          |
| <b>Age [years]</b>                                             | 16.00 (14.00-17.00)              |
| <b>TC [mg/dL]</b>                                              | 164.50 (140.00-180.00)           |
| <b>Glucose disposal rate<br/>[mg/(kg × min)]</b>               | 6.08 (5.25-7.29)                 |
| <b>HDL [mg/dL]</b>                                             | 60.50 (50.00-70.00)              |
| <b>LDL [mg/dL]</b>                                             | 85.00 (75.00-107.00)             |
| <b>Vitamin D [ng/mL]</b>                                       | 21.65 (18.50-28.10)              |
| <b>Initial HbA1c [mmol/mol]</b>                                | 55.19 (50.82-59.56)              |
| <b>Initial HbA1c [%]</b>                                       | 7.20 (6.80-7.60)                 |
| <b>Disease duration [years]</b>                                | 6.00 (3.00-8.00)                 |
| <b>Mean daily insulin requirement<br/>[u/day/kg of weight]</b> | 0.77 (0.59-0.96)                 |
| <b>BMI [centile]</b>                                           | 80.96 (57.95-89.94)              |
| <b>TG [mg/L]</b>                                               | 70.50 (60.00-88.00)              |
| <b>Time using pump [years]</b>                                 | 3.00 (2.00-7.00)                 |
| <b>Prehypertension</b>                                         | 6 (23.08)                        |
| <b>Hypertension</b>                                            | 3 (11.54)                        |
| <b>Body fat [%]</b>                                            | 21.85 (15.00-29.20)              |
| <b>AST [IU/L]</b>                                              | 17.00 (15.00-19.00)              |
| <b>ALAT [IU/L]</b>                                             | 13.50 (10.00-15.00)              |

Tables S2. Comparison of baseline continuous glucose monitoring (CGM) metrics between 30% and 50% carbohydrate diet.

| CGM metric                                                               | 30% carbohydrate diet<br>Median (25%-75%) | 50% carbohydrate diet<br>Median (25%-75%) | p-value |
|--------------------------------------------------------------------------|-------------------------------------------|-------------------------------------------|---------|
| Time in target range (TIR)<br>70-180 mg/dL (3.9-10.0 mmol/l) (%)         | 87 (73 – 94)                              | 81 (77 – 89)                              | 0.2804  |
| Time above target range(TAR)<br>180 - 250 mg/dL (10.0 - 13.9 mmol/L) (%) | 8 (3 – 20)                                | 8 (4 – 16)                                | 0.8093  |

Table S3. Pre- and postprandial glycemia for n=220 observations.

| Meal                                 | Diet     | 30 minutes prior, 120 minutes after meal |                              | 30 minutes prior meal       |                              | 120 minutes after meal      |                              |
|--------------------------------------|----------|------------------------------------------|------------------------------|-----------------------------|------------------------------|-----------------------------|------------------------------|
|                                      |          | Mean sensor glucose [mg/dL]              | Coefficient of variation [%] | Mean sensor glucose [mg/dL] | Coefficient of variation [%] | Mean sensor glucose [mg/dL] | Coefficient of variation [%] |
| Breakfast (7:00 AM)                  | 30% n=20 | 125.29± 35.79                            | 15.02±6.67                   | 122.75 ± 33.88              | 14.42±6.60                   | 132.72 ± 50.77              | 2.55±1.87                    |
|                                      | 50% n=24 | 150.49±49.98                             | 15.31±6.09                   | 151.09±50.15                | 14.71±7.28                   | 146.61±56.97                | 4.29±2.68                    |
| 2 <sup>nd</sup> Breakfast (10:00 AM) | 30% n=21 | 136.86±26.10                             | 11.61±6.44                   | 137.27 ± 26.11              | 10.70±6.03                   | 131.83±36.15                | 2.65±1.92                    |
|                                      | 50% n=27 | 116.03±40.74                             | 18.61±8.43                   | 115.83±40.16                | 17.09±7.66                   | 110.70±54.33                | 4.98±3.55                    |
| Dinner (1:00 PM)                     | 30% n=20 | 138.93±47.66                             | 11.81±6.38                   | 138.91±48.21                | 10.85±5.98                   | 136.06±52.42                | 3.20±1.65                    |
|                                      | 50% n=24 | 118.14±42.48                             | 16.14±8.49                   | 118.61±42.76                | 15.78±8.58                   | 113.44±47.11                | 3.64±3.30                    |
| Afternoon snack (4:00 PM)            | 30% n=20 | 144.63±47.19                             | 9.00±4.44                    | 144.38±46.86                | 8.60±4.29                    | 144.40±52.54                | 1.98±1.45                    |
|                                      | 50% n=19 | 120.26±36.79                             | 15.56±5.88                   | 119.60±36.26                | 14.20±6.08                   | 120.56±46.20                | 3.41±2.55                    |
| Supper (7:00 PM)                     | 30% n=25 | 131.26±38.65                             | 13.55±7.14                   | 130.39±38.27                | 13.32±6.88                   | 133.34±48.10                | 3.12±2.16                    |
|                                      | 50% n=20 | 135.00±40.67                             | 13.96±7.81                   | 136.46±43.85                | 12.31±8.16                   | 124.29±38.36                | 3.75±3.08                    |

Table S4. Meal and insulin-therapy related factors for meals in paired-meals analysis (n=128 records).

| Meal                                 | Diet        | Caloric value [kcal]<br>Mean $\pm$ SD | Meal weight [g]<br>Mean $\pm$ SD | Hydrated carbon (CHO) [%g]<br>Mean $\pm$ SD | Carbohydrate exchange unit<br>Mean $\pm$ SD | Carbohydrates[g]<br>Mean $\pm$ SD | Fat-protein exchange unit<br>Mean $\pm$ SD | Fats[g]<br>Mean $\pm$ SD | Proteins[g]<br>Mean $\pm$ SD | Meal insulin requirements [U]<br>Mean $\pm$ SD |
|--------------------------------------|-------------|---------------------------------------|----------------------------------|---------------------------------------------|---------------------------------------------|-----------------------------------|--------------------------------------------|--------------------------|------------------------------|------------------------------------------------|
| Breakfast (7:00 AM)                  | 30%<br>n=11 | 413.64 $\pm$ 47.91                    | 280.00 $\pm$ 51.19               | 35.45 $\pm$ 5.68                            | 3.55 $\pm$ 0.57                             | 35.45 $\pm$ 5.68                  | 3.50 $\pm$ 0.33                            | 19.09 $\pm$ 3.02         | 44.55 $\pm$ 1.51             | 4.72 $\pm$ 2.53                                |
|                                      | 50%<br>n=11 | 415.45 $\pm$ 62.27                    | 266.36 $\pm$ 58.53               | 49.09 $\pm$ 9.44                            | 5.05 $\pm$ 0.96                             | 50.45 $\pm$ 9.61                  | 2.27 $\pm$ 0.47                            | 12.73 $\pm$ 4.67         | 19.09 $\pm$ 13.75            | 7.77 $\pm$ 3.73                                |
| 2 <sup>nd</sup> Breakfast (10:00 AM) | 30%<br>n=15 | 344.00 $\pm$ 141.90                   | 182.00 $\pm$ 122.89              | 26.67 $\pm$ 12.49                           | 2.77 $\pm$ 1.19                             | 27.67 $\pm$ 11.93                 | 1.97 $\pm$ 1.44                            | 5.67 $\pm$ 1.67          | 10.67 $\pm$ 1.76             | 3.69 $\pm$ 3.32                                |
|                                      | 50%<br>n=15 | 273.00 $\pm$ 39.77                    | 200.67 $\pm$ 31.95               | 26.33 $\pm$ 7.19                            | 2.47 $\pm$ 0.67                             | 24.67 $\pm$ 6.67                  | 0.91 $\pm$ 0.10                            | 5.00 $\pm$ 0.00          | 27.67 $\pm$ 2.58             | 3.63 $\pm$ 1.66                                |
| Dinner (1:00 PM)                     | 30%<br>n=10 | 412.00 $\pm$ 166.39                   | 297.50 $\pm$ 99.31               | 35.00 $\pm$ 13.54                           | 3.55 $\pm$ 1.26                             | 35.50 $\pm$ 12.57                 | 3.06 $\pm$ 1.39                            | 27.00 $\pm$ 2.58         | 10.00 $\pm$ 0.00             | 4.39 $\pm$ 2.01                                |
|                                      | 50%<br>n=13 | 503.08 $\pm$ 56.33                    | 442.31 $\pm$ 18.78               | 66.92 $\pm$ 7.51                            | 6.81 $\pm$ 0.83                             | 68.08 $\pm$ 8.30                  | 2.85 $\pm$ 0.09                            | 20.00 $\pm$ 0.00         | 10.00 $\pm$ 0.00             | 8.37 $\pm$ 4.38                                |
| Afternoon snack (4:00 PM)            | 30%<br>n=12 | 195.83 $\pm$ 56.48                    | 174.58 $\pm$ 30.86               | 20.83 $\pm$ 5.15                            | 2.13 $\pm$ 0.43                             | 21.25 $\pm$ 4.33                  | 1.09 $\pm$ 0.18                            | 5.42 $\pm$ 1.44          | 45.00 $\pm$ 0.00             | 2.62 $\pm$ 1.19                                |
|                                      | 50%<br>n=13 | 172.31 $\pm$ 20.48                    | 228.46 $\pm$ 19.08               | 23.08 $\pm$ 4.08                            | 2.15 $\pm$ 0.24                             | 21.53 $\pm$ 2.40                  | 0.88 $\pm$ 0.10                            | 5.00 $\pm$ 0.00          | 26.92 $\pm$ 2.53             | 2.62 $\pm$ 1.16                                |
| Supper (7:00 PM)                     | 30%<br>n=13 | 316.92 $\pm$ 46.79                    | 156.15 $\pm$ 35.95               | 29.62 $\pm$ 4.94                            | 2.96 $\pm$ 0.59                             | 29.62 $\pm$ 5.94                  | 1.17 $\pm$ 0.58                            | 8.46 $\pm$ 6.58          | 9.62 $\pm$ 1.39              | 3.28 $\pm$ 2.02                                |
|                                      | 50%<br>n=15 | 340.00 $\pm$ 37.80                    | 210.67 $\pm$ 18.31               | 45.33 $\pm$ 9.15                            | 4.23 $\pm$ 0.53                             | 42.33 $\pm$ 5.30                  | 1.63 $\pm$ 0.45                            | 11.33 $\pm$ 2.29         | 10.00 $\pm$ 0.00             | 4.09 $\pm$ 2.66                                |

Table S5. Number of meals from each patient taken for statistical analysis. Rows colored gray indicate paired meals.

|    | Breakfast<br>n=22/44 |     | 2 <sup>nd</sup> Breakfast<br>n=30/48 |     | Dinner<br>n=23/44 |     | Afternoon snack<br>n=25/39 |     | Supper<br>n=28/45 |     |
|----|----------------------|-----|--------------------------------------|-----|-------------------|-----|----------------------------|-----|-------------------|-----|
| ID | 30%                  | 50% | 30%                                  | 50% | 30%               | 50% | 30%                        | 50% | 30%               | 50% |
| 1  | 1                    | 1   | 0                                    | 2   | 0                 | 2   | 1                          | 1   | 1                 | 0   |
| 2  | 0                    | 0   | 0                                    | 0   | 0                 | 0   | 3                          | 0   | 0                 | 0   |
| 3  | 2                    | 0   | 2                                    | 1   | 0                 | 1   | 2                          | 0   | 1                 | 0   |
| 4  | 3                    | 1   | 2                                    | 0   | 1                 | 1   | 0                          | 0   | 1                 | 0   |
| 5  | 0                    | 1   | 2                                    | 1   | 1                 | 0   | 0                          | 2   | 2                 | 2   |
| 6  | 0                    | 0   | 1                                    | 0   | 0                 | 0   | 1                          | 2   | 1                 | 2   |
| 7  | 1                    | 1   | 1                                    | 1   | 2                 | 0   | 0                          | 0   | 2                 | 0   |
| 8  | 0                    | 1   | 0                                    | 2   | 1                 | 3   | 1                          | 1   | 0                 | 1   |
| 9  | 1                    | 0   | 1                                    | 0   | 2                 | 0   | 1                          | 2   | 0                 | 3   |
| 10 | 2                    | 2   | 1                                    | 0   | 1                 | 0   | 1                          | 1   | 1                 | 0   |
| 11 | 1                    | 2   | 1                                    | 2   | 1                 | 1   | 1                          | 1   | 2                 | 1   |
| 12 | 0                    | 1   | 0                                    | 0   | 0                 | 1   | 1                          | 0   | 1                 | 1   |
| 13 | 2                    | 0   | 1                                    | 1   | 0                 | 1   | 1                          | 1   | 1                 | 1   |
| 14 | 1                    | 0   | 2                                    | 2   | 0                 | 3   | 0                          | 1   | 1                 | 0   |
| 15 | 0                    | 1   | 0                                    | 3   | 1                 | 1   | 0                          | 0   | 1                 | 3   |
| 16 | 2                    | 0   | 0                                    | 2   | 0                 | 1   | 0                          | 2   | 2                 | 1   |
| 17 | 2                    | 1   | 0                                    | 1   | 0                 | 2   | 2                          | 0   | 1                 | 2   |
| 19 | 0                    | 0   | 1                                    | 2   | 2                 | 1   | 1                          | 1   | 0                 | 0   |
| 21 | 0                    | 2   | 0                                    | 0   | 1                 | 1   | 0                          | 0   | 1                 | 0   |
| 22 | 1                    | 3   | 1                                    | 2   | 0                 | 0   | 1                          | 1   | 0                 | 1   |
| 23 | 0                    | 2   | 0                                    | 1   | 1                 | 2   | 0                          | 0   | 0                 | 0   |
| 24 | 1                    | 0   | 0                                    | 0   | 2                 | 0   | 0                          | 0   | 1                 | 0   |
| 25 | 0                    | 2   | 1                                    | 2   | 1                 | 1   | 1                          | 1   | 2                 | 0   |
| 27 | 0                    | 1   | 0                                    | 1   | 1                 | 2   | 0                          | 1   | 2                 | 2   |
| 29 | 0                    | 0   | 1                                    | 0   | 0                 | 0   | 0                          | 0   | 0                 | 0   |
| 30 | 0                    | 2   | 3                                    | 1   | 2                 | 0   | 2                          | 1   | 1                 | 0   |
